# Supplementary material for: DNA barcoding and LC-MS metabolite profiling of the lichen-forming genus Melanelia: Specimen identification and discrimination focusing on Icelandic taxa
Source: PubMed Central journal article supplement (PMC5443556; doi:10.1371/journal.pone.0178012), 2017-05-24
Supplement: pone.0178012.s001.pdf [file pone.0178012.s001.pdf]

S1 Table. Voucher information and sequence accession numbers.

| Genus             | Species/lineage    | Voucher Number           | Country   | State/Province/Zone          | ITS GenBank Accession # |
|-------------------|--------------------|--------------------------|-----------|------------------------------|-------------------------|
| <i>Melanella</i>  | <i>hepatizon</i>   | ESH-098.164 (C)          | Greenland | NW n, Siropuluk              | KF257943                |
| <i>Melanella</i>  | <i>hepatizon</i>   | ESH-098.026 (C)          | Greenland | NW n, Qaanaaq                | KF257944                |
| <i>Melanella</i>  | <i>hepatizon</i>   | ESH-10B.014 (C)          | Greenland | SEm, Tasilaq                 | KF257945                |
| <i>Melanella</i>  | <i>hepatizon</i>   | ESH-10A.019 (C)          | Greenland | SWm, Nuua                    | KF257946                |
| <i>Melanella</i>  | <i>hepatizon</i>   | ESH-08.036 (C)           | Greenland | S, Qaortoq                   | KF257947                |
| <i>Melanella</i>  | <i>hepatizon</i>   | ESH-08.170 (C)           | Greenland | S, Igaliku                   | KF257948                |
| <i>Melanella</i>  | <i>hepatizon</i>   | ESH-08.263 (C)           | Greenland | S, Narsarsuaq                | KF257949                |
| <i>Melanella</i>  | <i>hepatizon</i>   | ESH-08.215 (C)           | Greenland | S, Igaliku                   | KF257950                |
| <i>Melanella</i>  | <i>hepatizon</i>   | ESH-09.386 (C)           | Greenland | SWm, Midgaard                | KF257951                |
| <i>Melanella</i>  | <i>hepatizon</i>   | ESH-09.324 (C)           | Greenland | SWm, Frederikshab Isblink    | KF257952                |
| <i>Melanella</i>  | <i>hepatizon</i>   | ESH-08.477 (C)           | Greenland | S, Igaliku                   | KF257953                |
| <i>Melanella</i>  | <i>hepatizon</i>   | BC-9677 (LD)             | Canada    | British Columbia             | AF141369                |
| <i>Melanella</i>  | <i>hepatizon</i>   | DNA-AT934 (LD)           | Italy     | Biozen Co.                   | AF451176                |
| <i>Melanella</i>  | <i>hepatizon</i>   | Wedin 6812 (UPS)         | Sweden    | unknown                      | DQ980016                |
| <i>Melanella</i>  | <i>hepatizon</i>   | LA30501                  | Iceland   | Iau                          | KY508674                |
| <i>Melanella</i>  | <i>hepatizon</i>   | LA30676                  | Iceland   | Ive                          | KY508675                |
| <i>Melanella</i>  | <i>hepatizon</i>   | LA30674                  | Iceland   | Ive                          | KY508676                |
| <i>Melanella</i>  | <i>hepatizon</i>   | LA30675                  | Iceland   | Ive                          | KY508677                |
| <i>Melanella</i>  | <i>hepatizon</i>   | LA30673                  | Iceland   | Ive                          | KY508678                |
| <i>Melanella</i>  | <i>hepatizon</i>   | LA20781                  | Iceland   | Ino                          | KY508679                |
| <i>Melanella</i>  | <i>hepatizon</i>   | LA31860                  | Iceland   | Iny                          | KY508680                |
| <i>Melanella</i>  | <i>hepatizon</i>   | LA31861                  | Iceland   | Iny                          | KY963376                |
| <i>Melanella</i>  | <i>agnata</i>      | ESH-09.478 (C)           | Greenland | SW m, Jensens Nunatakker     | KF257940                |
| <i>Melanella</i>  | <i>agnata</i>      | ESH-09.435 (C)           | Greenland | SW m, Jensens Nunatakker     | KF257941                |
| <i>Melanella</i>  | <i>agnata</i>      | ESH-07.464 (C)           | Greenland | N, Constable Burt            | KF257942                |
| <i>Melanella</i>  | <i>agnata</i>      | LA29683                  | Iceland   | Imi                          | KY508672                |
| <i>Melanella</i>  | <i>agnata</i>      | LA27562                  | Iceland   | Ino                          | KY963373                |
| <i>Melanella</i>  | <i>agnata</i>      | LA30974                  | Iceland   | Iso                          | KY508673                |
| <i>Melanella</i>  | <i>agnata</i>      | LA31859                  | Iceland   | Ino                          | KY963374                |
| <i>Melanella</i>  | <i>stygia</i>      | ESH-08.036               | Greenland | S, Qaortoq                   | KF257954                |
| <i>Melanella</i>  | <i>stygia</i>      | ESH-08.478               | Greenland | S, Igaliku                   | KF257955                |
| <i>Melanella</i>  | <i>stygia</i>      | FIN-9714 (LD)            | Finland   | Nyland                       | AF115763                |
| <i>Melanella</i>  | <i>stygia</i>      | DNA-AT922 (LD)           | Italy     | unknown                      | AF451775                |
| <i>Melanella</i>  | <i>stygia</i>      | Haakonson 20365          | Finland   | Eronkoski                    | AY611097                |
| <i>Melanella</i>  | <i>stygia</i>      | Hafelner 51658           | Austria   | Steiermark                   | AY611121                |
| <i>Melanella</i>  | <i>stygia</i>      | LA1972                   | Iceland   | Iau                          | KY508681                |
| <i>Melanella</i>  | <i>stygia</i>      | LA28243                  | Iceland   | Iau                          | KY963375                |
| <i>Melanella</i>  | <i>stygia</i>      | LA20775                  | Iceland   | Iau                          | KY508682                |
| <i>Melanella</i>  | <i>stygia</i>      | LA16894                  | Iceland   | Iau                          | KY508683                |
| <i>Montanella</i> | <i>disjuncta</i>   | Sorbille s.n. (GZU)      | Canada    | Yukon                        | KF257956                |
| <i>Montanella</i> | <i>disjuncta</i>   | ESH-098.363 (C)          | Greenland | NW n, Siropuluk              | KF257957                |
| <i>Montanella</i> | <i>disjuncta</i>   | ESH-08.304 (C)           | Greenland | S, Igaliku                   | KF257958                |
| <i>Montanella</i> | <i>disjuncta</i>   | ESH-09B.051 (C)          | Greenland | NW n, Qaanaaq                | KF257959                |
| <i>Montanella</i> | <i>disjuncta</i>   | Harris 55589 (NY)        | USA       | Maine                        | KF257960                |
| <i>Montanella</i> | <i>disjuncta</i>   | Bierke WP286-2 (TLE)     | Norway    | Tromso                       | KF257961                |
| <i>Montanella</i> | <i>disjuncta</i>   | Esslinger BP94-3 (TLE)   | Canada    | Yukon                        | KF257962                |
| <i>Montanella</i> | <i>disjuncta</i>   | Esslinger 19403 (TLE)    | USA       | Alaska                       | KF257968                |
| <i>Montanella</i> | <i>disjuncta</i>   | ESH-08.216 (C)           | Greenland | S, Igaliku                   | KF257970                |
| <i>Montanella</i> | <i>disjuncta</i>   | ESH-09B.323 (C)          | Greenland | NW n, Siropuluk              | KF257971                |
| <i>Montanella</i> | <i>disjuncta</i>   | Mayrhofer 13743          | Austria   | Steiermark                   | AY611077                |
| <i>Montanella</i> | <i>disjuncta</i>   | Wedin 7143 (UPS)         | Sweden    | unknown                      | DQ980015                |
| <i>Montanella</i> | <i>disjuncta</i>   | 15512 (MAF)              | India     | Uttaranchal                  | GU944556                |
| <i>Montanella</i> | <i>disjuncta</i>   | 17227 (MAF-Lich)         | UK        | Scotland                     | JX974654                |
| <i>Montanella</i> | <i>disjuncta</i>   | 15512 (MAF-Lich)         | India     | Uttar Pradesh                | KF257972                |
| <i>Montanella</i> | <i>disjuncta</i>   | ESH-098.363              | Greenland | Northwest                    | KP771825                |
| <i>Montanella</i> | <i>disjuncta</i>   | ESH-08.304               | Greenland | South                        | KP771826                |
| <i>Montanella</i> | <i>disjuncta</i>   | ESH-09B.051              | Greenland | Northwest                    | KP771827                |
| <i>Montanella</i> | <i>disjuncta</i>   | ESH-08.216               | Greenland | South                        | KP771828                |
| <i>Montanella</i> | <i>disjuncta</i>   | ESH-09B.323              | Greenland | Northwest                    | KP771833                |
| <i>Montanella</i> | <i>disjuncta</i>   | Esslinger 19403          | USA       | Alaska                       | KP771831                |
| <i>Montanella</i> | <i>disjuncta</i>   | Harris 52938             | USA       | Maine                        | KP771828                |
| <i>Montanella</i> | <i>disjuncta</i>   | Lumbsch 2010M7           | USA       | unknown                      | JX126181                |
| <i>Montanella</i> | <i>disjuncta</i>   | Bierke WP286-2 (TLE)     | Norway    | Tromso                       | KP771829                |
| <i>Montanella</i> | <i>disjuncta</i>   | Wedin 7143 (UPS)         | Sweden    | Lycsele Lapomark             | KP771834                |
| <i>Montanella</i> | <i>disjuncta</i>   | Coppins s.n. (MAF)       | UK        | Scotland                     | KP771835                |
| <i>Montanella</i> | <i>disjuncta</i>   | MAF-Lich 15512           | India     | Uttaranchal                  | KP771837                |
| <i>Montanella</i> | <i>disjuncta</i>   | Esslinger BP94-3 (TLE)   | Canada    | Yukon                        | KP771830                |
| <i>Montanella</i> | <i>disjuncta</i>   | Esslinger BP94-3 (TLE)   | Canada    | Yukon                        | KF257967                |
| <i>Montanella</i> | <i>disjuncta</i>   | LA28245                  | Iceland   | Iau                          | KY963377                |
| <i>Montanella</i> | <i>disjuncta</i>   | LA30617                  | Iceland   | Ino                          | KY508684                |
| <i>Montanella</i> | <i>disjuncta</i>   | LA27588                  | Iceland   | Ino                          | KY508685                |
| <i>Montanella</i> | <i>disjuncta</i>   | LA31552                  | Iceland   | Ino                          | KY963378                |
| <i>Montanella</i> | <i>disjuncta</i>   | LA30657                  | Iceland   | Ino                          | KY508686                |
| <i>Montanella</i> | <i>parniformis</i> | Lumbsch 2010M8 (F)       | USA       | Maine, Washington Co.        | KF257973                |
| <i>Montanella</i> | <i>parniformis</i> | Harris 55688 (NY)        | USA       | Maine                        | KF257974                |
| <i>Montanella</i> | <i>parniformis</i> | Harris 54728 (NY)        | USA       | Maine                        | KF257975                |
| <i>Montanella</i> | <i>parniformis</i> | Harris 52834 (NY)        | USA       | Maine                        | KF257976                |
| <i>Montanella</i> | <i>parniformis</i> | Lumbsch 2010M8           | USA       | Maine                        | KP771838                |
| <i>Montanella</i> | <i>parniformis</i> | Harris 55585             | USA       | Maine                        | KP771839                |
| <i>Montanella</i> | <i>parniformis</i> | Harris 54728 (NY)        | USA       | Maine                        | KP771840                |
| <i>Montanella</i> | <i>parniformis</i> | Harris 52834(NY)         | USA       | Maine                        | KP771841                |
| <i>Montanella</i> | <i>parniformis</i> | Ohmura 9654 (TNS)        | Japan     | AzusaYama                    | KM386099                |
| <i>Montanella</i> | <i>sorediata</i>   | Lendemer 13329 (NY)      | USA       | Pennsylvania                 | KF257978                |
| <i>Montanella</i> | <i>sorediata</i>   | Lendemer 13329 (NY)      | USA       | Pennsylvania                 | KP771846                |
| <i>Montanella</i> | <i>sorediata</i>   | Spribile 31972 (GZU)     | Russia    | Khabarovsk Krai              | KF257981                |
| <i>Montanella</i> | <i>sorediata</i>   | Spribile 31972 (GZU)     | Russia    | Khabarovsk Krai              | KP771847                |
| <i>Montanella</i> | <i>sorediata</i>   | Wedin 6862 (UPS)         | Sweden    | Vasterbotten                 | GU944557                |
| <i>Montanella</i> | <i>sorediata</i>   | Wedin 6862 (UPS)         | Sweden    | Vasterbotten                 | KP771845                |
| <i>Montanella</i> | <i>sorediata</i>   | Ohmura 9666 (TNS)        | Japan     | Mt. Ohyama                   | KM386101                |
| <i>Montanella</i> | <i>tomini</i>      | s.n.                     | China     | Hellonqiang                  | KF257983                |
| <i>Montanella</i> | <i>tomini</i>      | s.n.                     | China     | Hellonqiang                  | KF257984                |
| <i>Montanella</i> | <i>tomini</i>      | Leavitt s.n. (F)         | USA       | Utah, Wayne Co.              | KF257985                |
| <i>Montanella</i> | <i>tomini</i>      | Esslinger 16627 (TLE)    | USA       | Montana                      | KF257986                |
| <i>Montanella</i> | <i>tomini</i>      | 32307 (BRY-C)            | USA       | New Mexico, Catron Co.       | KF257987                |
| <i>Montanella</i> | <i>tomini</i>      | Henson 54 (TLE)          | USA       | Colorado                     | KF257988                |
| <i>Montanella</i> | <i>tomini</i>      | Leavitt 1021             | USA       | Utah, Wayne Co.              | KF257989                |
| <i>Montanella</i> | <i>tomini</i>      | Leavitt 1022             | USA       | Utah, Wayne Co.              | KF257990                |
| <i>Montanella</i> | <i>tomini</i>      | Lendemer 4494 (NY)       | USA       | California                   | KF257991                |
| <i>Montanella</i> | <i>tomini</i>      | Lendemer 19701 (NY)      | USA       | California                   | KF257992                |
| <i>Montanella</i> | <i>tomini</i>      | Esslinger BP20-1 (TLE)   | Canada    | Yukon Territory              | KF257998                |
| <i>Montanella</i> | <i>tomini</i>      | HMAS-L-114000            | China     | Hebei, Mt. Wulinshan         | EU784154                |
| <i>Montanella</i> | <i>tomini</i>      | HMAS-L-036389            | China     | Inner Mongolia, Mt. Anxan    | EU784155                |
| <i>Montanella</i> | <i>tomini</i>      | HMAS-L-071058            | China     | Inner Mongolia, Bairin Youxi | EU784156                |
| <i>Montanella</i> | <i>tomini</i>      | 17025 (MAF-Lich)         | India     | Sikkim                       | KF257999                |
| <i>Montanella</i> | <i>tomini</i>      | 15516 (MAF-Lich)         | India     | Uttaranchal                  | GU944559                |
| <i>Montanella</i> | <i>tomini</i>      | Hutten 14162 (YOSE)      | USA       | California                   | KP771848                |
| <i>Montanella</i> | <i>tomini</i>      | Esslinger 16627 (TLE)    | USA       | Montana                      | KP771849                |
| <i>Montanella</i> | <i>tomini</i>      | Lendemer 4494 (NY)       | USA       | California                   | KP771854                |
| <i>Montanella</i> | <i>tomini</i>      | Lendemer 19701 (NY)      | USA       | California                   | KP771855                |
| <i>Montanella</i> | <i>tomini</i>      | Henson 54 (TLE)          | USA       | Colorado                     | KP771851                |
| <i>Montanella</i> | <i>tomini</i>      | Leavitt 1022 (F)         | USA       | Utah                         | KP771853                |
| <i>Montanella</i> | <i>tomini</i>      | 32307 (BRY-C)            | USA       | New Mexico, Catron Co.       | KP771850                |
| <i>Montanella</i> | <i>tomini</i>      | Leavitt 1021 (F)         | USA       | Utah                         | KP771852                |
| <i>Montanella</i> | <i>tomini</i>      | Ren, Qiang s.n. (HMAS-L) | China     | Hellonqiang                  | KP771856                |
| <i>Montanella</i> | <i>tomini</i>      | Ren, Qiang s.n. (HMAS-L) | China     | Hellonqiang                  | KP771858                |
| <i>Montanella</i> | <i>tomini</i>      | Esslinger BP20-1 (TLE)   | Canada    | Yukon                        | KP771857                |
