# Supplementary material for: DNA barcoding and LC-MS metabolite profiling of the lichen-forming genus Melanelia: Specimen identification and discrimination focusing on Icelandic taxa
Source: PubMed Central journal article supplement (PMC5443556; doi:10.1371/journal.pone.0178012), 2017-05-24
Supplement: pone.0178012.s002.pdf [file pone.0178012.s002.pdf]

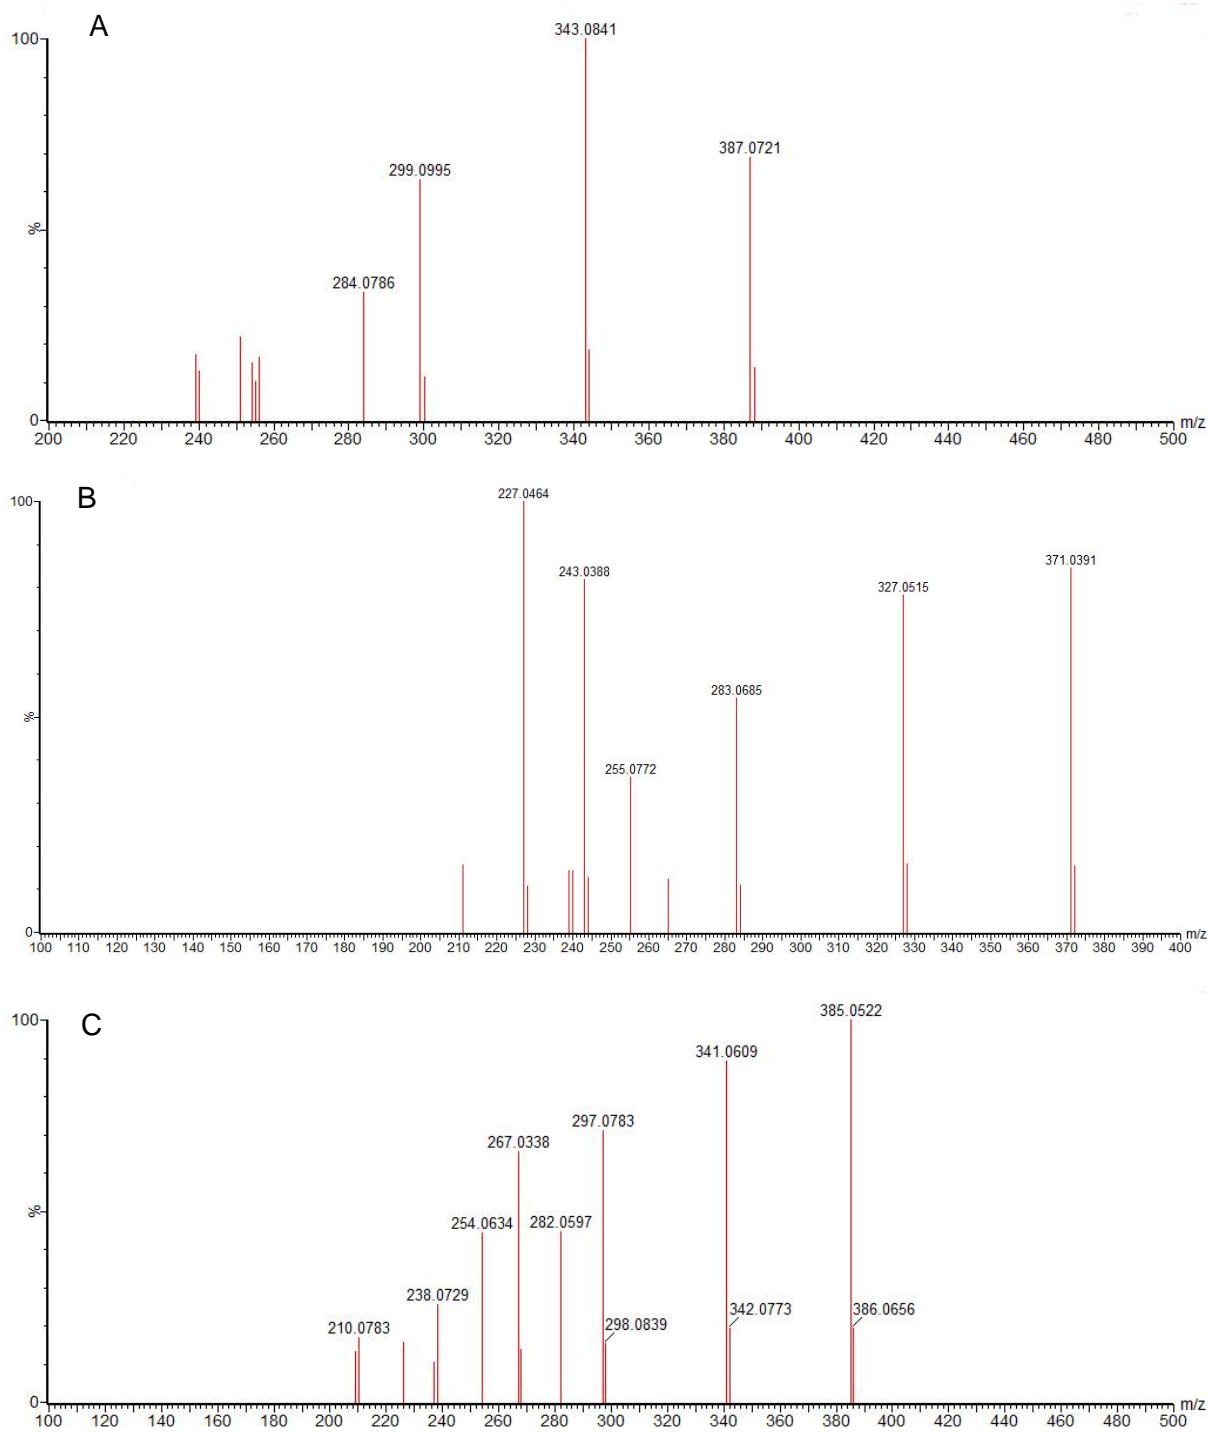

**S1 Fig. MS<sup>2</sup> spectra of depsidones in the lichen *Melanelia hepaticum*. (A) cryptostictic acid **1**. (B) stictic acid **2**. (C) norstictic acid **3**.**
