# Supplementary material for: DNA barcoding and LC-MS metabolite profiling of the lichen-forming genus Melanelia: Specimen identification and discrimination focusing on Icelandic taxa
Source: PubMed Central journal article supplement (PMC5443556; doi:10.1371/journal.pone.0178012), 2017-05-24
Supplement: pone.0178012.s003.pdf [file pone.0178012.s003.pdf]

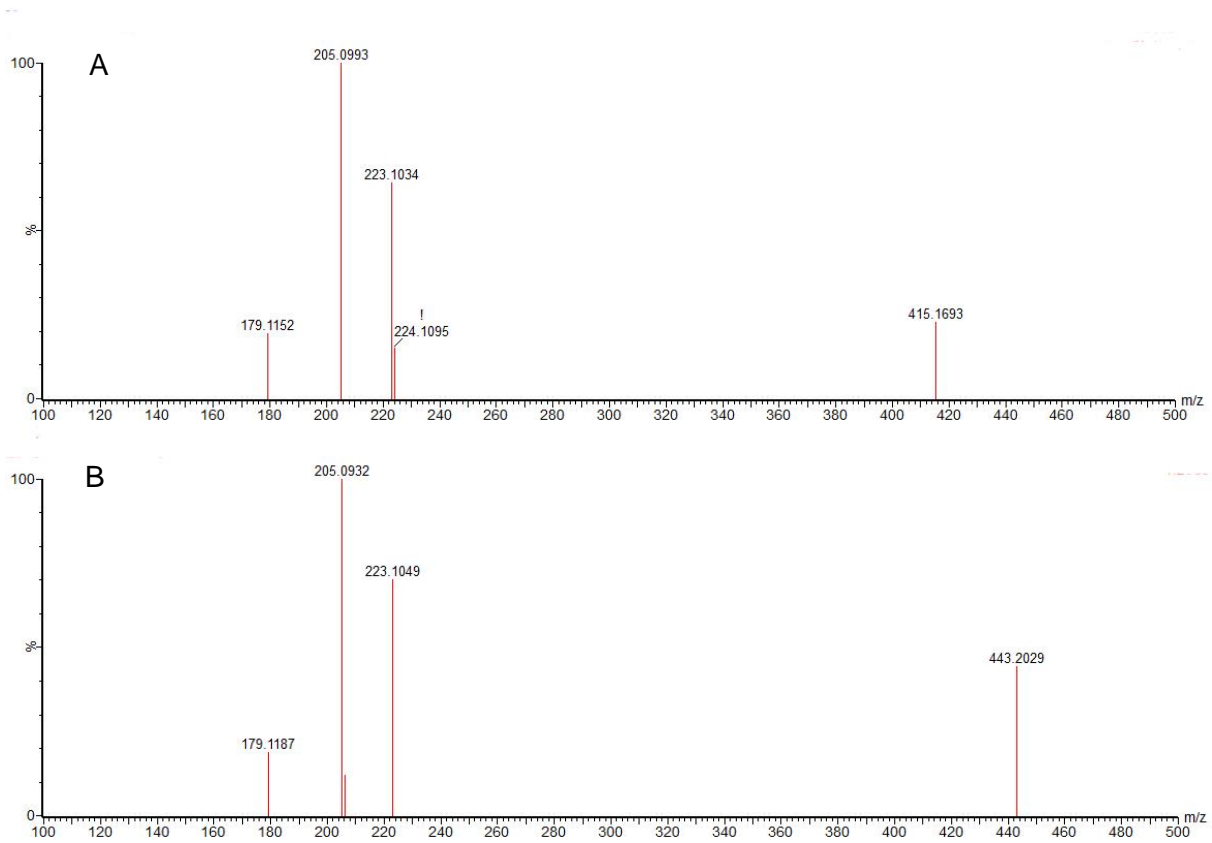

**S2 Fig. MS<sup>2</sup> spectra of depsides in the lichen *Montanelia disjuncta*. (A) stenosporic acid **5**. (B) perlatolic acid **7**.**
