# Supplementary material for: DNA barcoding and LC-MS metabolite profiling of the lichen-forming genus Melanelia: Specimen identification and discrimination focusing on Icelandic taxa
Source: PubMed Central journal article supplement (PMC5443556; doi:10.1371/journal.pone.0178012), 2017-05-24
Supplement: pone.0178012.s004.pdf [file pone.0178012.s004.pdf]

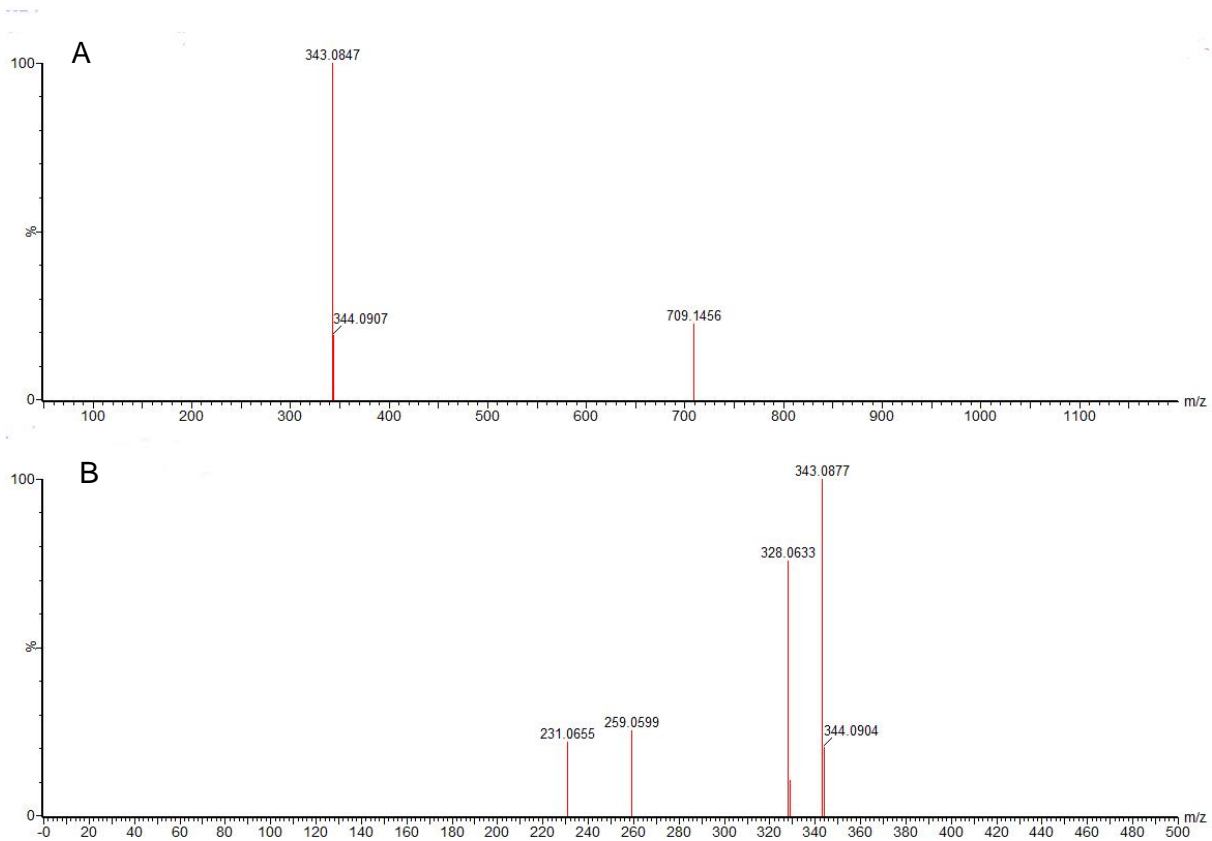

**S3 Fig. MS and MS<sup>2</sup> spectra of usnic acid in one chemotype of the lichen *Montanelia disjuncta*.**  
(A) MS spectrum of usnic acid **4** showing the adduct ion at m/z 709.1456 and molecular ion at m/z 343.0847. (B) MS<sup>2</sup> spectrum of the usnic acid molecular ion.
