# Supplementary material for: DNA barcoding and LC-MS metabolite profiling of the lichen-forming genus Melanelia: Specimen identification and discrimination focusing on Icelandic taxa
Source: PubMed Central journal article supplement (PMC5443556; doi:10.1371/journal.pone.0178012), 2017-05-24
Supplement: pone.0178012.s006.pdf [file pone.0178012.s006.pdf]

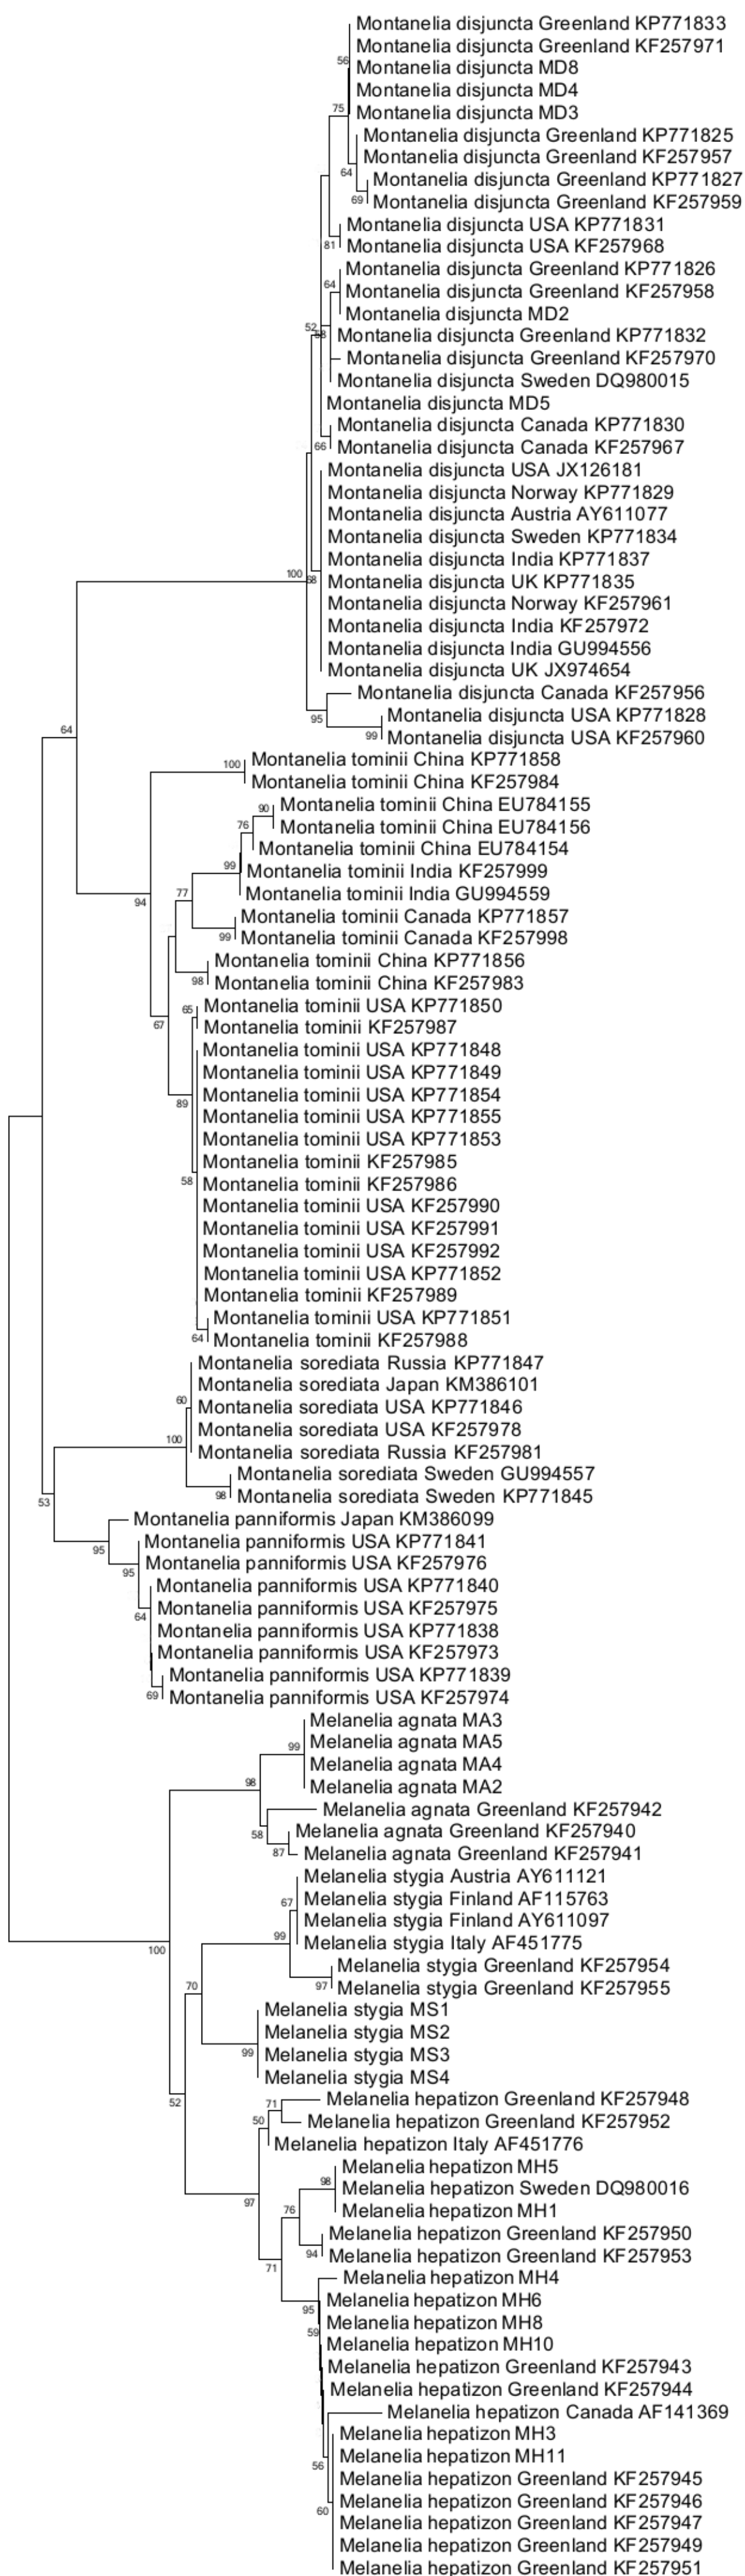

0.0100

**S5 Fig. Neighbor-joining nrITS tree from 116 specimens representing all *Melanelia* and *Montanelia* species. Bootstrap values (%) over 50 are labelled above branches.**
