# Supplementary material for: DNA barcoding and LC-MS metabolite profiling of the lichen-forming genus Melanelia: Specimen identification and discrimination focusing on Icelandic taxa
Source: PubMed Central journal article supplement (PMC5443556; doi:10.1371/journal.pone.0178012), 2017-05-24

**S6 Fig. Bayesian nrITS gene tree from 116 specimens representing all *Melanella* and *Montanella* species. Posterior probabilities over 0.94 are labelled above branches.**

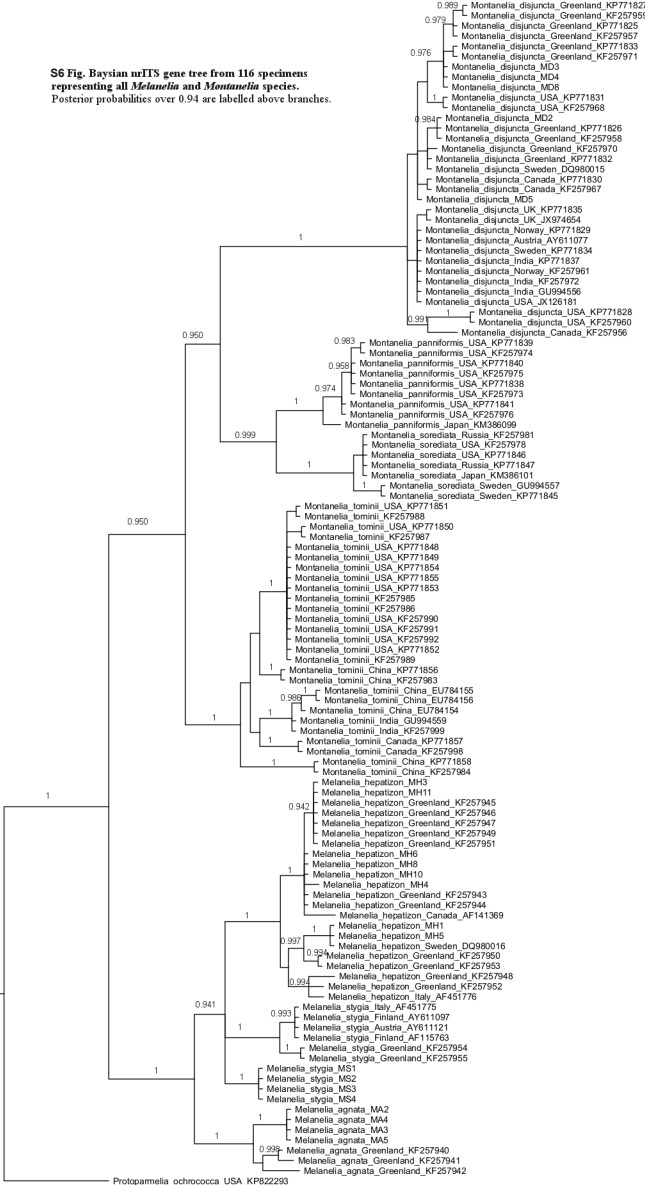

Supplement: pone.0178012.s007.pdf [file pone.0178012.s007.pdf]
