# Supplementary material for: DNA barcoding and LC-MS metabolite profiling of the lichen-forming genus Melanelia: Specimen identification and discrimination focusing on Icelandic taxa
Source: PubMed Central journal article supplement (PMC5443556; doi:10.1371/journal.pone.0178012), 2017-05-24

S7 Fig. Maximum likelihood nrITS gene tree from 116 specimens representing all *Melanelia* and *Montanelia* species. Bootstrap values (%) over 70 are labelled above branches.

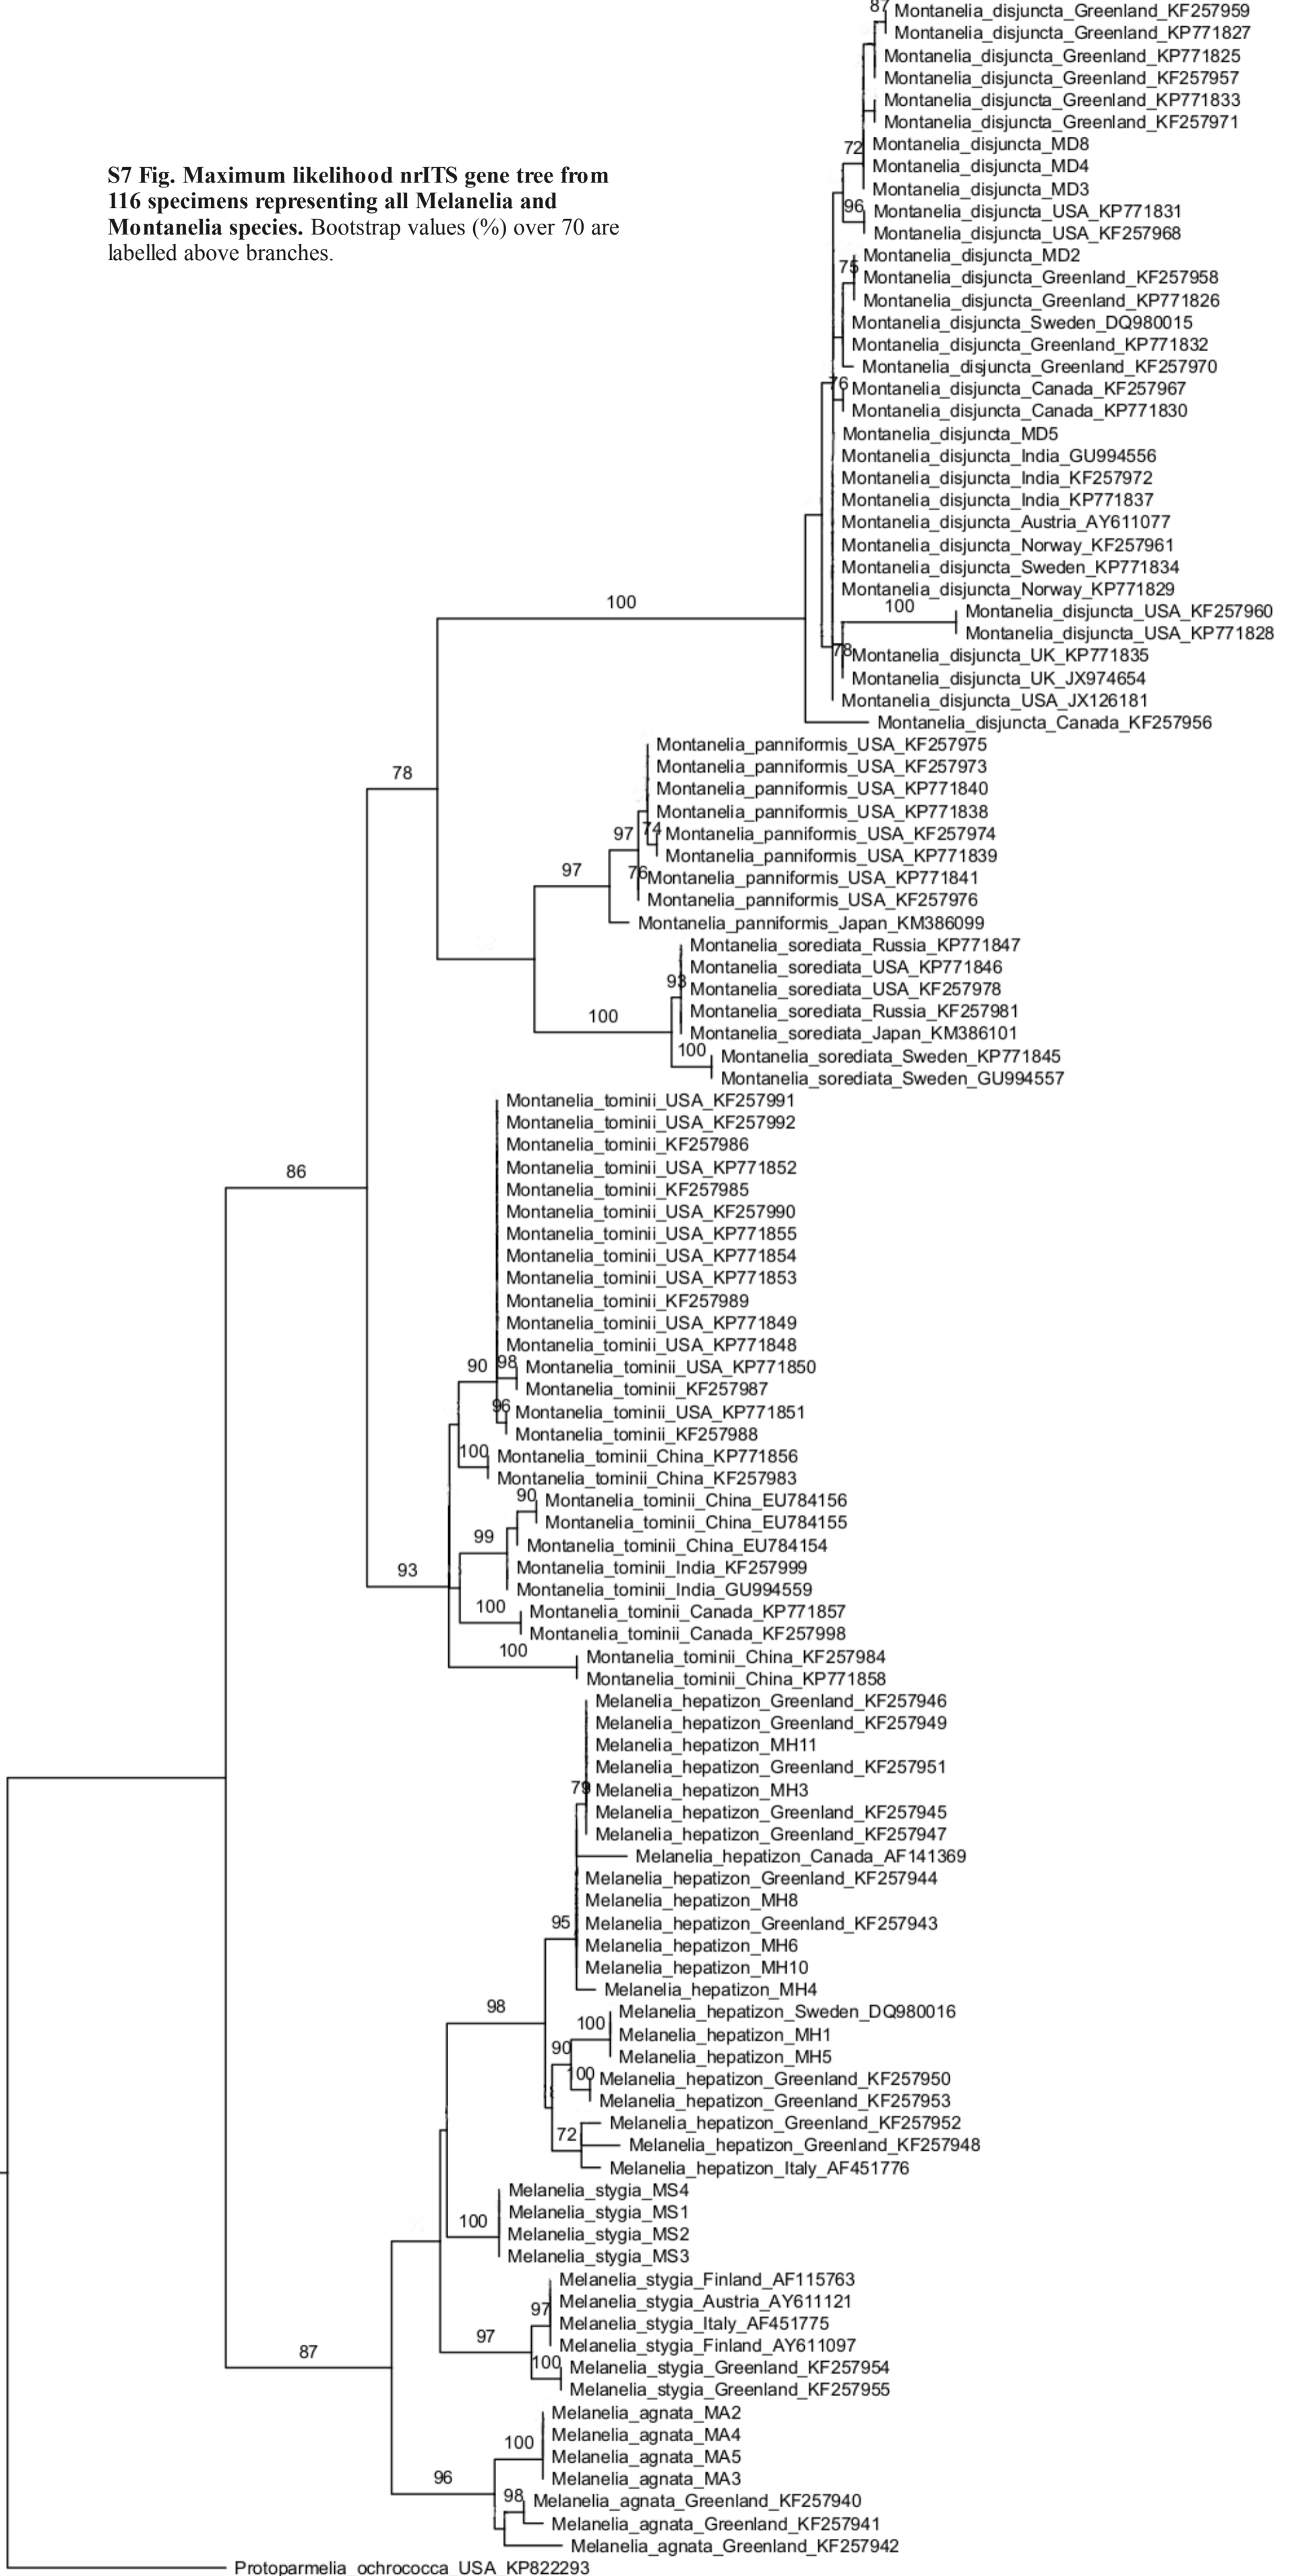

Supplement: pone.0178012.s008.pdf [file pone.0178012.s008.pdf]
